# Supplementary material for: Stereo-Selectivity of Human Serum Albumin to Enantiomeric and Isoelectronic Pollutants Dissected by Spectroscopy, Calorimetry and Bioinformatics
Source: PubMed Central journal article supplement (PMC3206814; doi:10.1371/journal.pone.0026186), 2011-11-02
Supplement: pone.0026186.s003.pdf [file pone.0026186.s003.pdf]

**Table S1.** Interaction profile of pollutants with HSA after *flexible* docking with AutoDock where number of contacts for corresponding residues to the ligand are given in parentheses and residues corresponding to  $\Delta\text{ASA} > 10 \text{ \AA}^2$  are in bold.

| Site | Pollutants | H-Bonding       |                     |                                         | Hydrophobic interactions |                     |                                         | $\Delta G$<br>(kcal. mol <sup>-1</sup> ) | $K_b$<br>(M <sup>-1</sup> ) | $\Delta C_p^{\text{calc}}$<br>(kcal.mol <sup>-1</sup> K <sup>-1</sup> ) |
|------|------------|-----------------|---------------------|-----------------------------------------|--------------------------|---------------------|-----------------------------------------|------------------------------------------|-----------------------------|-------------------------------------------------------------------------|
|      |            | Residues        | Average distance(Å) | $\Delta\text{ASA}$<br>(Å <sup>2</sup> ) | Residues                 | Average distance(Å) | $\Delta\text{ASA}$<br>(Å <sup>2</sup> ) |                                          |                             |                                                                         |
| 1    | 1N         | L234 (1)        | 3.13                | 2.77                                    | L219 (3)                 | 3.37                | 9.91                                    | -7.23                                    | $2.00 \times 10^5$          | 0.038                                                                   |
|      |            |                 |                     |                                         | L234 (1)                 | 3.46                | 2.77                                    |                                          |                             |                                                                         |
|      |            |                 |                     |                                         | <b>L238</b> (3)          | 3.70                | 26.83                                   |                                          |                             |                                                                         |
|      |            |                 |                     |                                         | <b>L260</b> (3)          | 3.55                | 10.65                                   |                                          |                             |                                                                         |
|      |            |                 |                     |                                         | <b>I264</b> (6)          | 3.72                | 16.29                                   |                                          |                             |                                                                         |
|      |            |                 |                     | <b>I290</b> (3)                         | 3.50                     | 18.48               |                                         |                                          |                             |                                                                         |
|      | 2N         | <b>R257</b> (1) | 2.75                | 14.65                                   | K199 (1)                 | 3.81                | 2.11                                    | -7.28                                    | $2.18 \times 10^5$          | 0.024                                                                   |
|      |            | S287 (1)        | 2.87                | 1.12                                    | <b>L238</b> (2),         | 3.79                | 27.93                                   |                                          |                             |                                                                         |
|      |            |                 |                     |                                         | <b>L260</b> (1),         | 3.44                | 13.62                                   |                                          |                             |                                                                         |
|      |            |                 |                     |                                         | A261 (3),                | 3.60                | 3.69                                    |                                          |                             |                                                                         |
|      |            |                 |                     | I264 (2),                               | 3.56                     | 5.56                |                                         |                                          |                             |                                                                         |
|      |            |                 |                     | <b>I290</b> (7)                         | 3.68                     | 21.08               |                                         |                                          |                             |                                                                         |
|      |            |                 |                     | <b>A291</b> (3)                         | 3.85                     | 18.18               |                                         |                                          |                             |                                                                         |
| 8H   | -----      | -----           | -----               | <b>L219</b> (2)                         | 3.63                     | 10.76               | -7.96                                   | $6.84 \times 10^5$                       | 0.039                       |                                                                         |
|      |            |                 |                     | L234 (3)                                | 3.77                     | 4.38                |                                         |                                          |                             |                                                                         |
|      |            |                 |                     | <b>L238</b> (2)                         | 3.84                     | 29.78               |                                         |                                          |                             |                                                                         |
|      |            |                 |                     | L260 (6)                                | 3.65                     | 9.56                |                                         |                                          |                             |                                                                         |
|      |            |                 |                     | A261(2)                                 | 3.65                     | 6.44                |                                         |                                          |                             |                                                                         |
|      |            |                 |                     | I264 (2)                                | 3.76                     | 5.83                |                                         |                                          |                             |                                                                         |
|      |            |                 |                     | <b>I290</b> (3)                         | 3.72                     | 21.76               |                                         |                                          |                             |                                                                         |
|      |            |                 |                     |                                         |                          |                     |                                         |                                          |                             |                                                                         |
| 2    | 1N         | <b>Y411</b> (1) | 2.63                | 13.91                                   | <b>N391</b> (5)          | 3.68                | 27.08                                   | -8.20                                    | $1.03 \times 10^6$          | 0.016                                                                   |
|      |            |                 |                     |                                         | F403 (2)                 | 3.74                | 4.12                                    |                                          |                             |                                                                         |
|      |            |                 |                     |                                         | L407 (2)                 | 3.65                | 7.06                                    |                                          |                             |                                                                         |
|      |            |                 |                     |                                         | <b>V433</b> (3)          | 3.64                | 10.53                                   |                                          |                             |                                                                         |
|      |            |                 |                     |                                         | <b>L453</b> (6)          | 3.69                | 38.3                                    |                                          |                             |                                                                         |
|      | 2N         | <b>R410</b> (1) | 3.09                | 13.72                                   | <b>Y411</b> (7)          | 3.73                | 32.81                                   | -7.90                                    | $6.21 \times 10^5$          | 0.016                                                                   |
|      |            |                 |                     |                                         | K414 (1)                 | 3.80                | 7.87                                    |                                          |                             |                                                                         |
|      |            |                 |                     |                                         | <b>L430</b> (2)          | 3.74                | 39.15                                   |                                          |                             |                                                                         |
|      |            |                 |                     |                                         | <b>F488</b> (5)          | 3.65                | 28.64                                   |                                          |                             |                                                                         |
|      | 8H         | <b>Y411</b> (2) | 2.84                | 16.14                                   | <b>Y411</b> (2)          | 3.58                | 16.14                                   | -8.35                                    | $1.32 \times 10^6$          | 0.010                                                                   |
|      |            |                 |                     |                                         | <b>R485</b> (3)          | 3.61                | 16.72                                   |                                          |                             |                                                                         |
|      |            |                 |                     |                                         | <b>F488</b> (12)         | 3.75                | 41.52                                   |                                          |                             |                                                                         |
|      |            |                 |                     |                                         |                          |                     |                                         |                                          |                             |                                                                         |
