# Supplementary material for: Stereo-Selectivity of Human Serum Albumin to Enantiomeric and Isoelectronic Pollutants Dissected by Spectroscopy, Calorimetry and Bioinformatics
Source: PubMed Central journal article supplement (PMC3206814; doi:10.1371/journal.pone.0026186), 2011-11-02
Supplement: pone.0026186.s004.pdf [file pone.0026186.s004.pdf]

**Table S2.** Interaction profile of pollutants with HSA after *rigid* docking with AutoDock where number of contacts for corresponding residues to the ligand are given in parentheses and residues corresponding to  $\Delta\text{ASA}>10 \text{ \AA}^2$  are in bold.

| Site | Pollutants      | H-Bonding       |                     |                                         | Hydrophobic interactions |                     |                                         | $\Delta G$<br>(kcal. mol <sup>-1</sup> ) | $K_b$<br>(M <sup>-1</sup> ) | $\Delta C_P^{\text{calc}}$ ,<br>(kcal.mol <sup>-1</sup> K <sup>-1</sup> ) |       |
|------|-----------------|-----------------|---------------------|-----------------------------------------|--------------------------|---------------------|-----------------------------------------|------------------------------------------|-----------------------------|---------------------------------------------------------------------------|-------|
|      |                 | Residues        | Average distance(Å) | $\Delta\text{ASA}$<br>(Å <sup>2</sup> ) | Residues                 | Average distance(Å) | $\Delta\text{ASA}$<br>(Å <sup>2</sup> ) |                                          |                             |                                                                           |       |
| 1    | 1N              | Y150 (1)        | 2.79                | 5.79                                    | <b>L238</b> (2)          | 3.45                | 26.95                                   | -5.45                                    | 9.93×10 <sup>3</sup>        | 0.023                                                                     |       |
|      |                 | <b>R257</b> (2) | 2.94                | 13.48                                   | <b>R257</b> (4)          | 3.59                | 13.48                                   |                                          |                             |                                                                           |       |
|      |                 |                 |                     |                                         | <b>L260</b> (2)          | 3.87                | 11.29                                   |                                          |                             |                                                                           |       |
|      | 2N              | <b>R257</b> (1) | A261 (1)            | 3.02                                    | 4.13                     | A261 (3)            | 3.66                                    |                                          |                             |                                                                           | 4.13  |
|      |                 |                 | S287 (1)            | 3.24                                    | 4.65                     | I264 (2)            | 3.58                                    |                                          |                             |                                                                           | 8.41  |
|      |                 |                 |                     |                                         |                          | <b>I290</b> (2)     | 3.50                                    |                                          |                             |                                                                           | 13.02 |
|      |                 |                 |                     |                                         |                          | <b>R257</b> (3)     | 3.69                                    |                                          |                             |                                                                           | 12.75 |
|      |                 |                 |                     |                                         |                          | <b>L260</b> (5)     | 3.52                                    |                                          |                             |                                                                           | 12.36 |
|      |                 |                 |                     |                                         |                          | A261 (1)            | 3.77                                    |                                          |                             |                                                                           | 4.13  |
|      |                 |                 |                     |                                         |                          | <b>I264</b> (2)     | 3.51                                    |                                          |                             |                                                                           | 10.9  |
|      |                 |                 |                     |                                         |                          | S287 (3)            | 3.56                                    |                                          |                             |                                                                           | 4.65  |
|      |                 |                 |                     |                                         |                          | <b>I290</b> (2)     | 3.84                                    |                                          |                             |                                                                           | 13.62 |
| 8H   | <b>R257</b> (2) | Y150 (1)        | 2.72                | 5.89                                    | A291 (4)                 | 3.57                | 7.64                                    |                                          |                             |                                                                           |       |
|      |                 |                 |                     |                                         | <b>L238</b> (2)          | 3.80                | 25.27                                   |                                          |                             |                                                                           |       |
|      |                 |                 |                     |                                         | <b>R257</b> (1)          | 3.18                | 13.47                                   |                                          |                             |                                                                           |       |
|      |                 |                 |                     |                                         | <b>L260</b> (1)          | 3.81                | 10.41                                   |                                          |                             |                                                                           |       |
|      |                 |                 |                     |                                         | A261 (1)                 | 3.73                | 4.13                                    |                                          |                             |                                                                           |       |
|      |                 |                 |                     |                                         | I264 (1)                 | 3.59                | 7.19                                    |                                          |                             |                                                                           |       |
|      |                 |                 |                     |                                         | <b>I290</b> (3)          | 3.66                | 13.53                                   |                                          |                             |                                                                           |       |
|      |                 |                 |                     |                                         | <b>A291</b> (3)          | 3.73                | 23.5                                    |                                          |                             |                                                                           |       |
|      |                 |                 |                     |                                         |                          |                     |                                         |                                          |                             |                                                                           |       |
|      |                 |                 |                     |                                         |                          |                     |                                         |                                          |                             |                                                                           |       |
| 2    | 1N              | <b>Y411</b> (1) | 2.83                | 10.75                                   | L387 (4)                 | 3.30                | 5.53                                    | -5.17                                    | 6.17×10 <sup>3</sup>        | 0.017                                                                     |       |
|      |                 |                 |                     |                                         | I388 (1)                 | 3.82                | 6.27                                    |                                          |                             |                                                                           |       |
|      |                 |                 |                     |                                         | <b>N391</b> (9)          | 3.56                | 17.35                                   |                                          |                             |                                                                           |       |
|      |                 |                 |                     |                                         | L407 (4)                 | 3.55                | 7.58                                    |                                          |                             |                                                                           |       |
|      |                 |                 |                     |                                         | <b>Y411</b> (1)          | 3.82                | 10.75                                   |                                          |                             |                                                                           |       |
|      |                 |                 |                     |                                         | L430 (3)                 | 3.55                | 6.44                                    |                                          |                             |                                                                           |       |
|      |                 |                 |                     |                                         | V433 (3)                 | 3.36                | 9.62                                    |                                          |                             |                                                                           |       |
|      | 2N              | R485 (1)        | 3.32                | 8.36                                    | <b>L453</b> (7)          | 3.67                | 18.85                                   |                                          |                             |                                                                           |       |
|      |                 |                 |                     |                                         | L387 (2)                 | 3.33                | 5.53                                    |                                          |                             |                                                                           |       |
|      |                 |                 |                     |                                         | <b>N391</b> (4)          | 3.48                | 14.24                                   |                                          |                             |                                                                           |       |
|      |                 |                 |                     |                                         | L407 (2)                 | 3.51                | 7.58                                    |                                          |                             |                                                                           |       |
|      |                 |                 |                     |                                         | <b>Y411</b> (1)          | 3.89                | 15.5                                    |                                          |                             |                                                                           |       |
|      |                 |                 |                     |                                         | L430 (6)                 | 3.65                | 9.75                                    |                                          |                             |                                                                           |       |
|      |                 |                 |                     |                                         | V433 (2)                 | 3.36                | 6.01                                    |                                          |                             |                                                                           |       |
|      |                 |                 |                     |                                         | <b>L453</b> (7)          | 3.60                | 21.45                                   |                                          |                             |                                                                           |       |
|      |                 |                 |                     |                                         | R485 (1)                 | 3.72                | 8.36                                    |                                          |                             |                                                                           |       |
|      |                 |                 |                     |                                         | 8H                       | L430 (1)            | 2.96                                    |                                          |                             |                                                                           | 6.56  |
|      | I388 (2)        | 3.67            | 6.76                |                                         |                          |                     |                                         |                                          |                             |                                                                           |       |
|      | <b>N391</b> (7) | 3.60            | 17.81               |                                         |                          |                     |                                         |                                          |                             |                                                                           |       |
|      | L407 (1)        | 3.90            | 7.58                |                                         |                          |                     |                                         |                                          |                             |                                                                           |       |
|      |                 |                 |                     | L430 (1)                                | 3.77                     | 6.56                |                                         |                                          |                             |                                                                           |       |
|      |                 |                 | <b>V433</b> (2)     | 3.64                                    | 10.86                    |                     |                                         |                                          |                             |                                                                           |       |
|      |                 |                 | <b>L453</b> (5)     | 3.54                                    | 18.81                    |                     |                                         |                                          |                             |                                                                           |       |
